# Supplementary material
Source: PubMed Central journal article supplement (PMC6110388)
Supplement: NIHMS978824-supplement-ESM1.pdf [file NIHMS978824-supplement-ESM1.pdf]

## **Electronic Supplementary Material**

### ***In Vivo* Biodistribution of Radiolabeled Acoustic Protein Nanostructures**

**Journal: Molecular Imaging and Biology**

Johann LE FLOC'H,<sup>1</sup> Aimen ZLITNI,<sup>2</sup> Holly A. BILTON,<sup>2</sup> Melissa YIN,<sup>1</sup> Arash FARHADI,<sup>3</sup> Nancy R. JANZEN,<sup>2</sup> Mikhail G. SHAPIRO,<sup>3</sup> John F. VALLIANT,<sup>2</sup> F. Stuart FOSTER<sup>1</sup>

**Running title:** Biodistribution of Gas Vesicles

**Manuscript category:** Article

<sup>1</sup>Department of Medical Biophysics, Sunnybrook Health Sciences Centre, Toronto, ON, Canada;

<sup>2</sup>Department of Chemistry and Chemical Biology, McMaster University, Hamilton, ON, Canada; and

<sup>3</sup>Division of Chemistry and Chemical Engineering, California Institute of Technology, Pasadena, California, USA

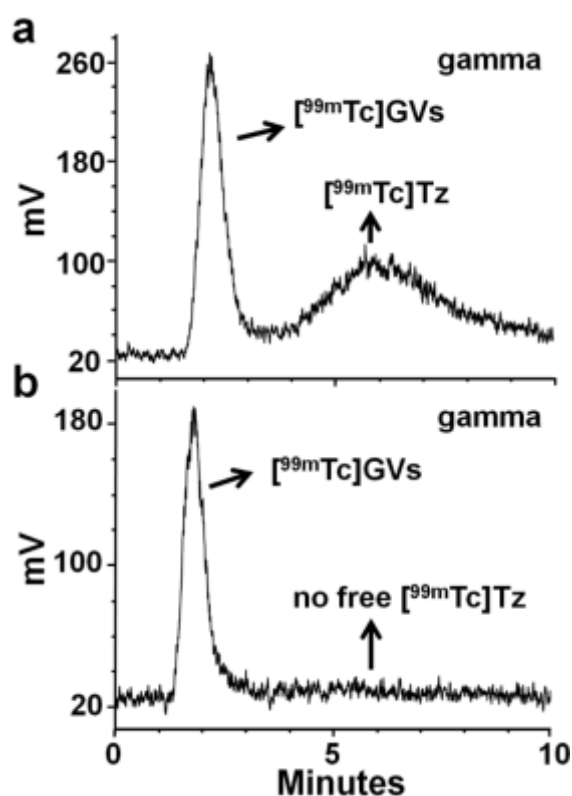

**Fig. S1** Size exclusion HPLC chromatograms (gamma detection). **a** Chromatogram of the reaction mixture containing both  $[^{99m}\text{Tc}]$ GVs and free  $[^{99m}\text{Tc}]$ Tz (3). **b** Purified  $[^{99m}\text{Tc}]$ GVs showing no residual  $[^{99m}\text{Tc}]$ Tz.

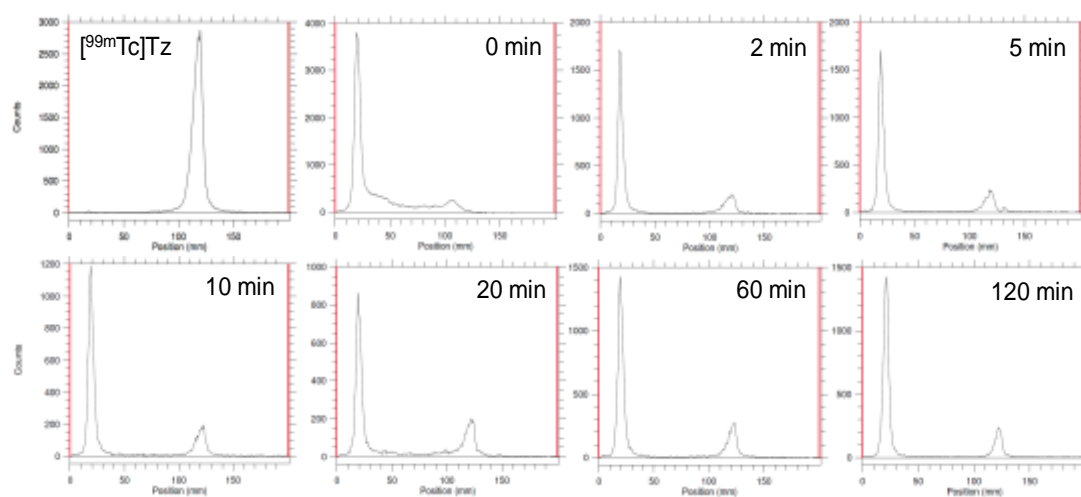

**Figure S2.** Radio-TLC analysis of  $[^{99m}\text{Tc}]$ Tz (Top-left). Radio-TLC analysis of  $[^{99m}\text{Tc}]$ GVs incubated at 37 °C in plasma at the indicated time points. Radio-TLC was eluted with 75% methanol and 25% water.

**Table S1. Stability in plasma.** Table reports the stability of [ $^{99m}\text{Tc}$ ]GVs in plasma at 37 °C for up to 120 minutes.

| Sample                                 | % [ $^{99m}\text{Tc}$ ]GVs | % Compound 3 |
|----------------------------------------|----------------------------|--------------|
| [ $^{99m}\text{Tc}$ ]Tz                | 0                          | 100          |
| Plasma[ $^{99m}\text{Tc}$ ]GVs 0 min   | 87                         | 13           |
| Plasma[ $^{99m}\text{Tc}$ ]GVs 2 min   | 80                         | 20           |
| Plasma[ $^{99m}\text{Tc}$ ]GVs 5 min   | 78                         | 22           |
| Plasma[ $^{99m}\text{Tc}$ ]GVs 10 min  | 78                         | 22           |
| Plasma[ $^{99m}\text{Tc}$ ]GVs 20 min  | 71                         | 29           |
| Plasma[ $^{99m}\text{Tc}$ ]GVs 60 min  | 76                         | 24           |
| Plasma[ $^{99m}\text{Tc}$ ]GVs 120 min | 81                         | 19           |

**Table S2. Activity in plasma layers.** Table reports the % Activity in the GV and plasma layers after centrifugal flotation at 60 and 120 minutes.

| Time    | % Activity in GV layer | % Activity in plasma layer |
|---------|------------------------|----------------------------|
| 60 min  | 31                     | 69                         |
| 120 min | 44                     | 56                         |

**Table S3. 3D Segmentation quantification.** Table reports the mean and SEM of the volume of segmented organs.

| Organs                    | Liver | Spleen | Lungs | Gall<br>Bladder | Duodenum | Bladder |
|---------------------------|-------|--------|-------|-----------------|----------|---------|
| Volume (cm <sup>3</sup> ) | 1.964 | 0.166  | 0.609 | 0.028           | 0.427    | 0.183   |
| SEM (n=6)                 | 0.176 | 0.017  | 0.032 | 0.005           | 0.082    | 0.020   |

**Table S4. Dynamic Uptake quantification.** Table reports the mean and SEM of the uptake rate constants. Rate constants were calculated using a linear regression for all organs using the 0-10 min range except for the duodenum for which the 30-60 min range was used.

| Organs                                   | Liver | Spleen | Lungs | Gall<br>Bladder | Duodenum | Bladder |
|------------------------------------------|-------|--------|-------|-----------------|----------|---------|
| Uptake Rate<br>Constants<br>(%ID/cc/min) | 2.760 | 0.584  | 1.433 | 5.254           | 0.935    | 0.422   |
| SEM (n=6)                                | 0.270 | 0.181  | 0.467 | 1.762           | 0.266    | 0.174   |

**Video S1. Spatio-temporal biodistribution of [<sup>99m</sup>Tc]GVs in mouse.** *In vivo* dynamic SPECT co-registered with microCT images showing the spatio-temporal biodistribution of [<sup>99m</sup>Tc]GVs in mouse organs in the axial, coronal and sagittal planes. **a** Movies show SPECT data, 68 s between each frame, duration of observation was 102 min between 18 and 120 min following [<sup>99m</sup>Tc]GVs injection. **b** Movies show SPECT data for the first 17 minutes following [<sup>99m</sup>Tc]GVs injection, 78 s between each frame including the first frame acquired before injection. SPECT data are filtered with an isotropic 1.6 mm Gaussian filter. The threshold used for the MIP is 0.5.
